# Supplementary material for: Structure of Geobacter OmcZ filaments suggests extracellular cytochrome polymers evolved independently multiple times
Source: eLife journal article supplement (doi:10.7554/elife.81551), 2022-09-05

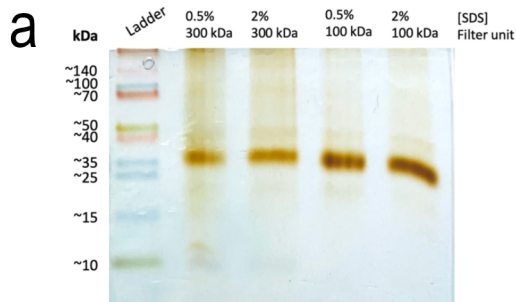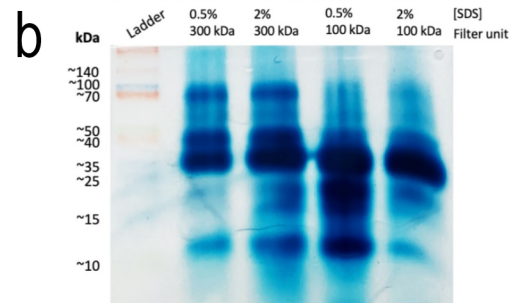

**c**

| Sequence          | Coverage |
|-------------------|----------|
| OmcZ <sub>L</sub> | 38.5%    |
| OmcZ <sub>S</sub> | 57.8%    |
| GSU1334           | 14.7%    |

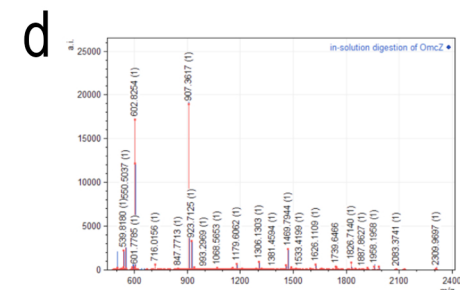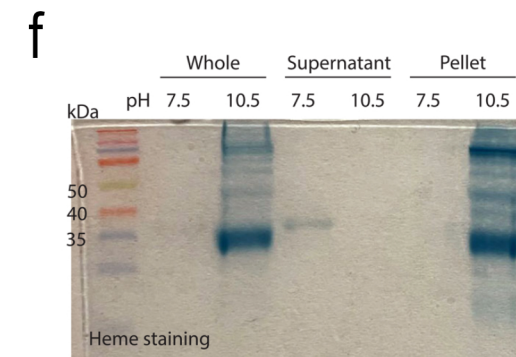

e

Sequence - OmcZ-s

| Accession  | Length     | Mo. Mass   | Av. Mass   | Coverage   | Matched Int. |            |            |
|------------|------------|------------|------------|------------|--------------|------------|------------|
|            | 258        | 28649.2196 | 28667.4468 | 57.8 %     | 1.0 %        |            |            |
| AVPPPPVNOF | LGIVDTKFPN | LTAKDCLCH  | VSDTVLVQOH | HALINTVTPP | ASCINTSGTV   | PPTLATGCHV | MVPDGSGGFT |
| EQDFRNC    | FNC        | HTQTPHHTSP | AAVAKDCKYC | HGNFIDNPLD | GHIYPTYSAS   | SVTPMPSGRS | VTATDGNVVI |
| APNAIDPKTN | TVRPIFSNQD | THHGTGITDC | NLCHNTSSNV | PIRQCEVCHG | VNSLHNIQKD   | SPNAANLGTV | KPGLEDLGMG |
| HIGNWDCQG  | CHWSMFGN   |            |            |            |              |            |            |

| Position | Modification    | Type     | Mo. Mass | Av. Mass | Formula                               |
|----------|-----------------|----------|----------|----------|---------------------------------------|
| All C    | Carbamidomethyl | fixed    | 57.0215  | 57.0514  | CH <sub>2</sub> CONH <sub>2</sub> - H |
| All M    | Oxidation       | variable | 15.9949  | 15.9994  | O                                     |
| All W    | Oxidation       | variable | 15.9949  | 15.9994  | O                                     |

| Meas. m/z | Calc. m/z | δ (Da)  | δ (ppm) | Ref. Int. (%) | z | Annotation                                                     | Formula         |
|-----------|-----------|---------|---------|---------------|---|----------------------------------------------------------------|-----------------|
| 585.1580  | 585.2337  | -0.0757 | -129.4  | 0.09          | 1 | [106-109] k.DCKY.c [1xCarbamidomethyl]                         | C24H36N6O9S     |
| 671.3691  | 671.4087  | -0.0395 | -58.9   | 0.18          | 1 | [228-234] I.GTVKPGLe                                           | C30H54N8O9      |
| 707.4091  | 707.3393  | 0.0698  | 98.7    | 0.04          | 1 | [22-27] I.TKADCL.e [1xCarbamidomethyl]                         | C28H50N8O11S    |
| 797.3179  | 797.3689  | -0.0510 | -63.9   | 0.01          | 1 | [240-246] w.GHIGNNW.d                                          | C35H48N12O10    |
| 797.3179  | 797.3035  | 0.0144  | 18.1    | 0.01          | 1 | [109-114] k.YCHGNF.I [1xCarbamidomethyl]                       | C35H44N10O10S   |
| 797.3834  | 797.3689  | 0.0145  | 18.2    | 0.01          | 1 | [240-246] w.GHIGNNW.d                                          | C35H48N12O10    |
| 797.3834  | 797.3035  | 0.0799  | 100.2   | 0.01          | 1 | [109-114] k.YCHGNF.I [1xCarbamidomethyl]                       | C35H44N10O10S   |
| 801.2911  | 801.3737  | -0.0826 | -103.1  | 0.04          | 1 | [220-227] k.DSPNAANL.g                                         | C32H52N10O14    |
| 834.3700  | 834.4356  | -0.0656 | -78.7   | 0.02          | 1 | [15-21] y.DTKFPLN.t                                            | C38H58N9O12     |
| 962.4421  | 962.3243  | 0.1178  | 122.4   | 0.13          | 1 | [247-253] w.DCQGHWS [2xCarbamidomethyl]                        | C38H51N13O13S2  |
| 965.4958  | 965.4363  | 0.0595  | 61.6    | 0.08          | 1 | [120-127] I.DGHIPTYS                                           | C45H60N10O14    |
| 1040.5002 | 1040.4697 | 0.0305  | 29.3    | 0.06          | 1 | [238-246] I.GWGHIGNNW.d                                        | C48H61N15O12    |
| 1043.4475 | 1043.4793 | -0.0317 | -30.4   | 0.04          | 1 | [115-123] I.IDNPLDGHY.I                                        | C46H66N12O16    |
| 1056.4672 | 1056.4646 | 0.0026  | 2.4     | 0.03          | 1 | [238-246] I.GWGHIGNNW.d [1xOxidation]                          | C48H61N15O13    |
| 1059.5734 | 1059.4775 | 0.0959  | 90.5    | 0.07          | 1 | [28-36] I.ECHVSDTVL.v [1xCarbamidomethyl]                      | C43H70N12O17S   |
| 1065.5388 | 1065.5728 | -0.0340 | -31.9   | 0.32          | 1 | [1-10] .AVPPPPVNOF.I                                           | C51H76N12O13    |
| 1176.7176 | 1176.5677 | 0.1499  | 127.4   | 0.08          | 1 | [128-139] y.SASSVTPMPSGR.s                                     | C47H81N15O18S   |
| 1178.6168 | 1178.6568 | -0.0400 | -33.9   | 0.04          | 1 | [1-11] .AVPPPPVNOF.L.g                                         | C57H87N13O14    |
| 1186.6073 | 1186.5310 | 0.0763  | 64.3    | 0.16          | 1 | [110-119] y.CHGNFIDNPL.d [1xCarbamidomethyl]                   | C51H75N15O16S   |
| 1192.5826 | 1192.5627 | 0.0199  | 16.7    | 0.13          | 1 | [128-139] y.SASSVTPMPSGR.s [1xOxidation]                       | C47H81N15O19S   |
| 1284.5285 | 1284.6113 | -0.0828 | -64.5   | 0.08          | 1 | [193-203] I.CHNTSSNPVR.q [1xCarbamidomethyl]                   | C51H85N19O18S   |
| 1453.7202 | 1453.7845 | -0.0443 | -30.5   | 0.02          | 1 | [220-234] k.DSPNAANL.GTVKPGLe                                  | C62H104N18O22   |
| 1650.7423 | 1650.8156 | -0.0733 | -44.4   | 0.01          | 1 | [124-139] y.IPTYSASSVTPMPSGR.s                                 | C71H115N19O24S  |
| 1650.7946 | 1650.8156 | -0.0210 | -12.7   | 0.01          | 1 | [124-139] y.IPTYSASSVTPMPSGR.s                                 | C71H115N19O24S  |
| 1739.6466 | 1739.7516 | -0.1050 | -60.3   | 1.85          | 1 | [65-81] I.ATGCHVMVPDGSGGFTF.q [1xCarbamidomethyl]              | C75H110N20O24S2 |
| 1740.5946 | 1740.6754 | -0.0808 | -46.4   | 0.39          | 1 | [240-253] w.GHIGNNWDCQGHWS [2xCarbamidomethyl]                 | C73H97N25O22S2  |
| 1755.6015 | 1755.7465 | -0.1450 | -82.6   | 0.05          | 1 | [65-81] I.ATGCHVMVPDGSGGFTF.q [1xCarbamidomethyl; 1xOxidation] | C75H110N20O25S2 |
| 1756.5444 | 1756.6703 | -0.1259 | -71.7   | 0.06          | 1 | [240-253] w.GHIGNNWDCQGHWS [2xCarbamidomethyl; 1xOxidation]    | C73H97N25O23S2  |
| 1769.8190 | 1769.7508 | 0.0682  | 38.6    | 0.01          | 1 | [177-192] I.SNQDTHHGTGIDCNL.c [1xCarbamidomethyl]              | C69H108N24O29S  |
| 1873.0927 | 1872.9021 | 0.1906  | 101.8   | 0.02          | 1 | [28-43] I.ECHVSDTVLVQQHIAL.I [1xCarbamidomethyl]               | C79H125N25O26S  |

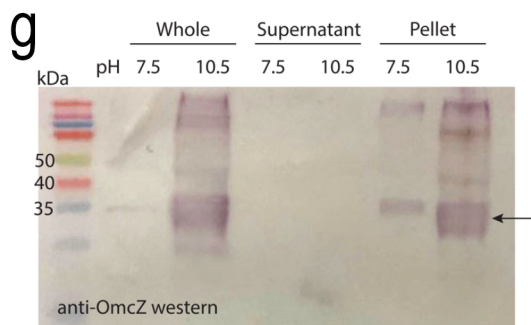

Supplement: supp [file elife_poa_e81551_Figure_1_figure_supplement_1.pdf › elife_poa_e81551_Figure_1_figure_supplement_1.pdf]
