# Supplementary figures and images for: Structure of Geobacter OmcZ filaments suggests extracellular cytochrome polymers evolved independently multiple times
Source: eLife journal article supplement (doi:10.7554/elife.81551), 2022-09-05

a

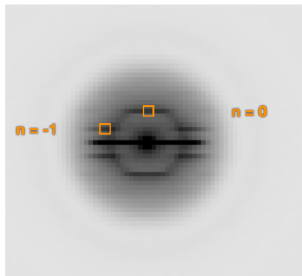

b

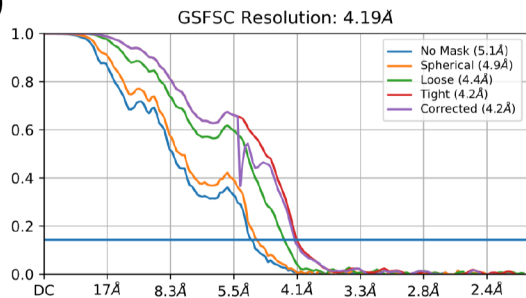

c

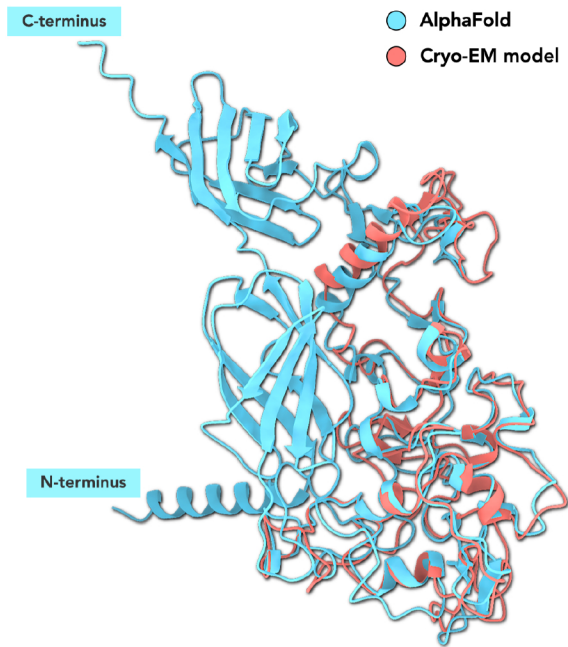

Supplement: supp [file elife_poa_e81551_Figure_1_figure_supplement_2.pdf › elife_poa_e81551_Figure_1_figure_supplement_2.pdf]
